# Supplementary material
Source: PubMed Central journal article supplement (PMC5161212)
Supplement: jciinsight-1-90733-s001.pdf [file jciinsight-1-90733-s001.pdf]

**SUPPLEMENTAL DATA:**  
**SUPPLEMENTARY FIGURE LEGENDS**  
**FIGURES S1-S6**  
**TABLES S1-S4**

***Heterogeneity of perivascular coverage in breast cancer is coordinated by Angiopoietin-2 and impacts metastasis and response to chemotherapy***

Jiha Kim<sup>1</sup>, Pedro Correa de Sampaio<sup>1</sup>, Donna Marie Lundy<sup>1</sup>, Qian Peng<sup>1</sup>, Kurt W. Evans<sup>2</sup>, Hikaru Sugimoto<sup>1</sup>, Mihai Gagea<sup>3</sup>, Yvonne Kienast<sup>4</sup>, Nayra Soares do Amaral<sup>5</sup>, Rafael Malagoli Rocha<sup>6</sup>, Hans P. Eikesdal<sup>7-8</sup>, Per Eystein Lønning<sup>7-8</sup>, Funda Meric-Bernstam<sup>2,9</sup> and Valerie S. LeBleu<sup>1</sup>

1. Department of Cancer Biology, University of Texas MD Anderson Cancer Center, Houston, TX 77054
2. Department of Investigational Cancer Therapeutics, University of Texas MD Anderson Cancer Center, Houston, TX 77054
3. Department of Veterinary Medicine and Surgery, University of Texas MD Anderson Cancer Center, Houston, TX 77054
4. Roche Pharma Research and Early Development, Penzberg, Germany
5. Department of Anatomic Pathology, AC Camargo Cancer Center, São Paulo, Brazil
6. Molecular Gynecology Laboratory, Gynecology Department, Federal University of São Paulo, Brazil
7. Section of Oncology, Department of Clinical Science, University of Bergen, Bergen, Norway
8. Department of Oncology, Haukeland University Hospital, Bergen, Norway
9. Department of Breast Surgical Oncology, University of Texas MD Anderson Cancer Center, Houston, TX 77054

# Supplementary Figure 1

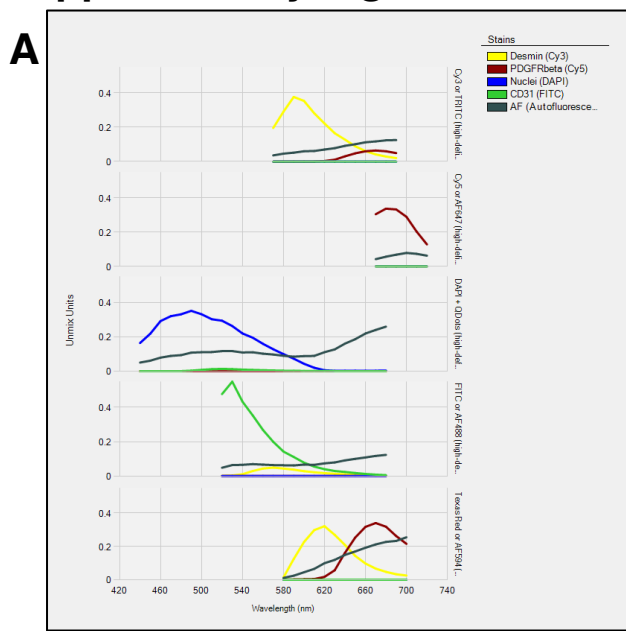

**B**

|   | Phenotype                                 | Markers                                                   | Description                                        |
|---|-------------------------------------------|-----------------------------------------------------------|----------------------------------------------------|
| ● | Blood vessels                             | CD31 <sup>+</sup>                                         | Endothelial tubular shape                          |
| ● | Pericyte (P <sup>+</sup> D <sup>-</sup> ) | PDGFRβ <sup>+</sup> Desmin <sup>-</sup>                   | Perivascular mesenchymal cells                     |
| ● | Pericyte (P <sup>+</sup> D <sup>+</sup> ) | PDGFRβ <sup>+</sup> Desmin <sup>+</sup>                   | Perivascular mesenchymal cells                     |
| ● | Pericyte (P <sup>+</sup> D <sup>+</sup> ) | PDGFRβ <sup>+</sup> Desmin <sup>+</sup>                   | Perivascular mesenchymal cells                     |
| ● | Other                                     | CD31 <sup>-</sup> PDGFRβ <sup>-</sup> Desmin <sup>-</sup> | Negative for all vascular and perivascular markers |

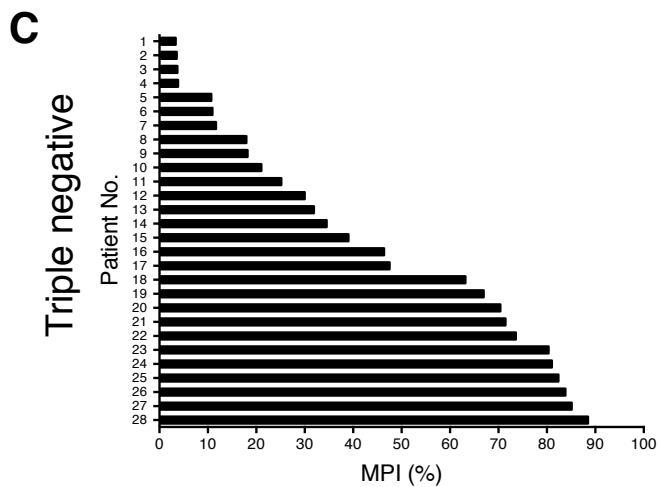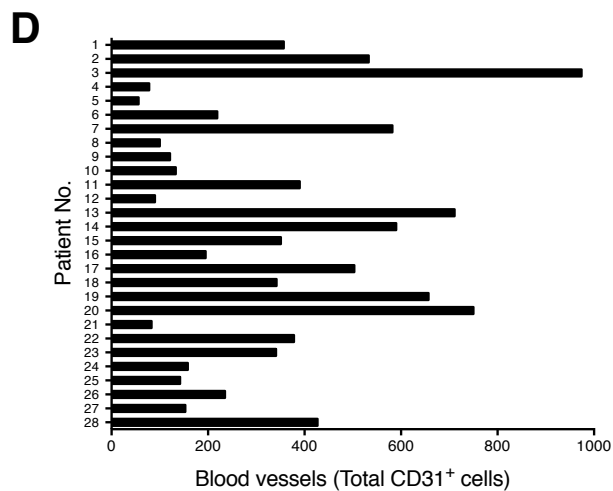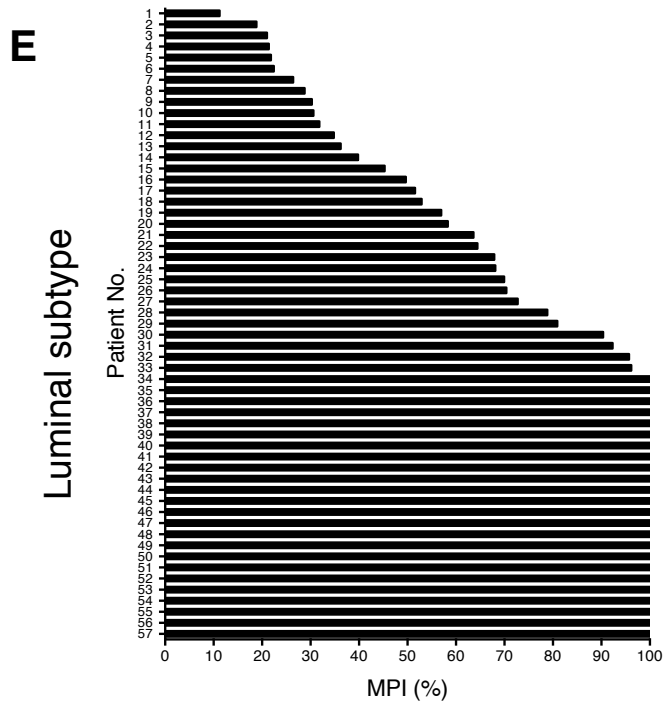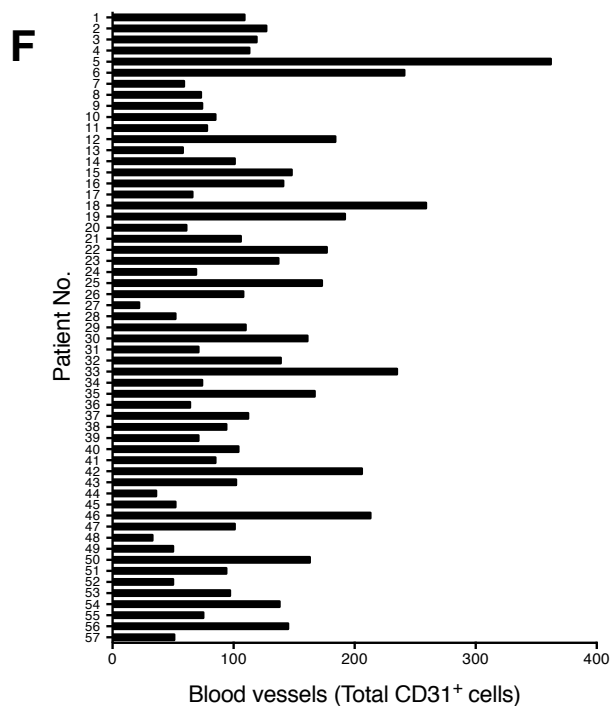

**Supplementary Figure Legends:**

**Supplementary Figure 1. Overview of the spectral unmixing and phenotyping analysis of multiplex stained tissues and individual patient distribution of pericyte coverage across different breast cancer subtypes in patient cohort 1**

**A.** Emission spectrum of all 5 markers obtained using the different filter cubes within the Vectra imaging system and used for spectral unmixing of multispectral images. **B.** Phenotype table identifying all cell phenotypes of interest based on the individual expression of CD31, Desmin and/or PDGFR $\beta$ . **C-F.** MPI (microvessels pericyte coverage index, %) (**C** and **E**) and total CD31<sup>+</sup> cells (**D** and **F**) for individual patient with either TNBC (**C** and **D**) or Luminal breast cancer (**E** and **F**). TNBC, n=28; Luminal, n=57.

# Supplementary Figure 2

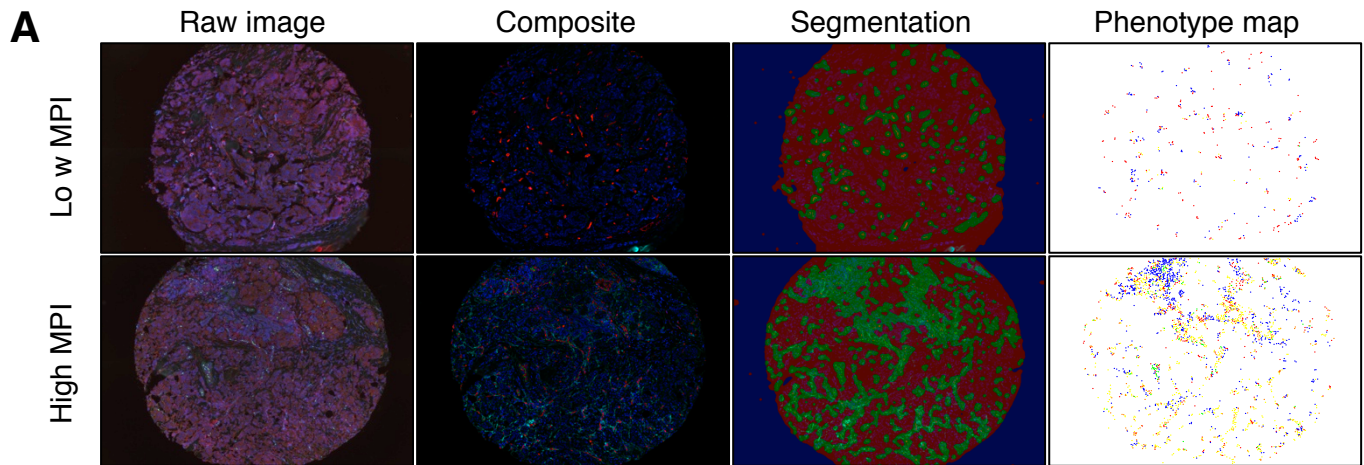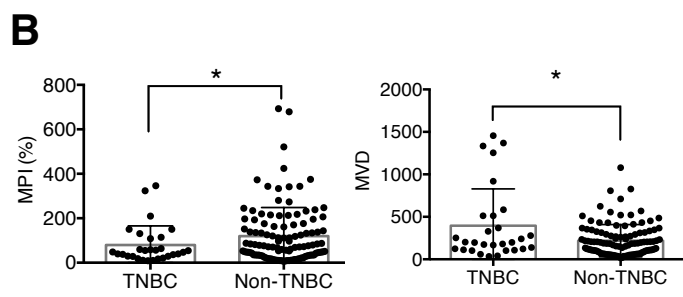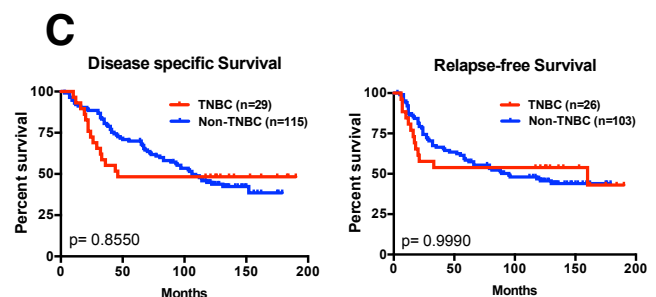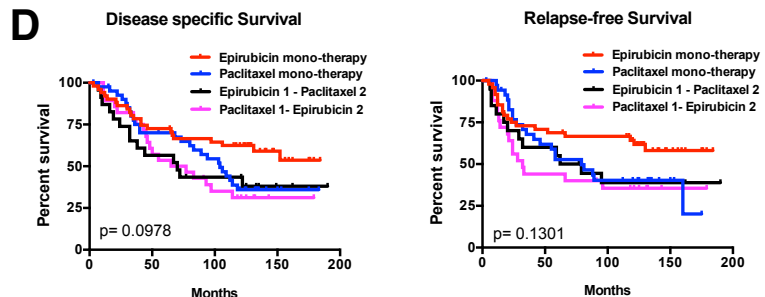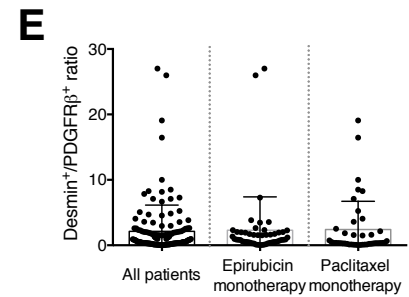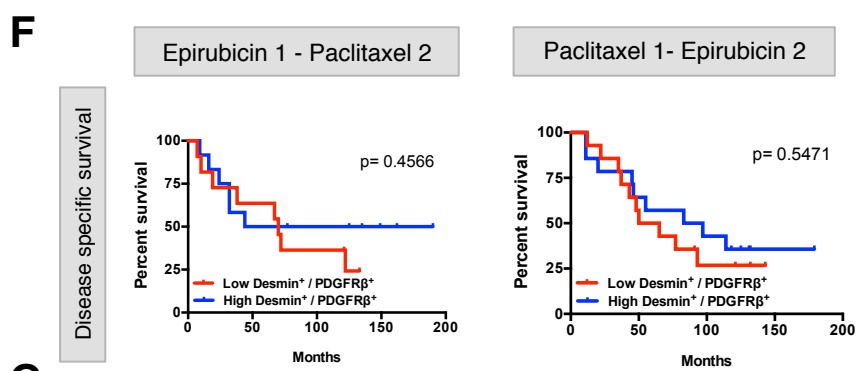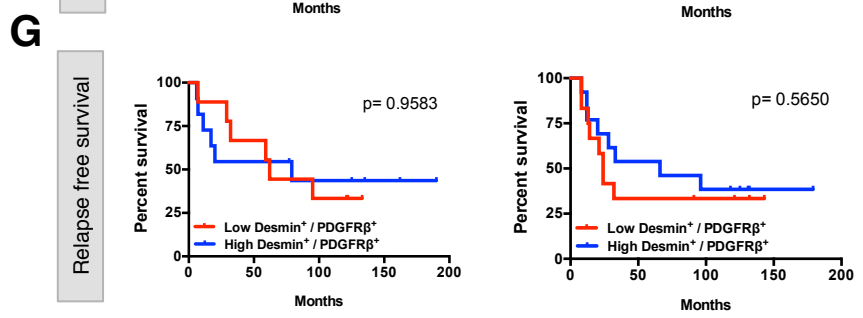

**Supplementary Figure 2. Differential microvascular and pericyte distribution and survival analyses of subgroups of patient in cohort 2**

**A.** Stitched high power (200x) images showing representative TMA tumor cores with differential pericytes coverage. Images displayed are raw, composite, perivascular segmentation and the cellular phenotype map displaying all previously defined cell populations (CD31<sup>+</sup> endothelial cells - red, PDGFR $\beta$ <sup>-</sup> Desmin<sup>+</sup> pericytes - green, PDGFR $\beta$ <sup>+</sup> Desmin<sup>-</sup> pericytes - yellow, PDGFR $\beta$ <sup>+</sup> Desmin<sup>+</sup> pericytes - orange, and other; blue). **B.** Quantification of MPI and MVD in indicated patient groups. TNBC, n=29; non-TNBC, n=115. Data is represented as the mean +/- S.D. Unpaired two-tailed t-test was used to determine statistical significance. \* p < 0.05. **C.** Disease-specific survival and relapse-free survival analysis of all patients based on breast cancer type (TNBC and non-TNBC). **D.** Disease-specific survival and relapse-free survival analysis based on different neoadjuvant treatment groups. **E.** PDGFR $\beta$ <sup>-</sup> Desmin<sup>+</sup> / PDGFR $\beta$ <sup>+</sup> Desmin<sup>-</sup> ratio distribution for all patient samples assessed and epirubicin and paclitaxel monotherapy groups (Table S3). **F-G.** Disease-specific survival (F) and relapse-free survival (G) analysis of patients in the epirubicin1-paclitaxel2 and paclitaxel1-epirubicin2 groups based on PDGFR $\beta$ <sup>-</sup> Desmin<sup>+</sup> / PDGFR $\beta$ <sup>+</sup> Desmin<sup>-</sup> pericytes ratio. High and low values were defined based on the median ratio values. Disease-specific survival analysis, epirubicin 1 - paclitaxel 2, n=23; paclitaxel 1- epirubicin 2, n=28. For relapse-free survival analysis, epirubicin 1 - paclitaxel 2, n=20; paclitaxel 1- epirubicin 2, n=25. Unless otherwise indicated, Log-rank test was used to determine statistical significance.

# Supplementary Figure 3

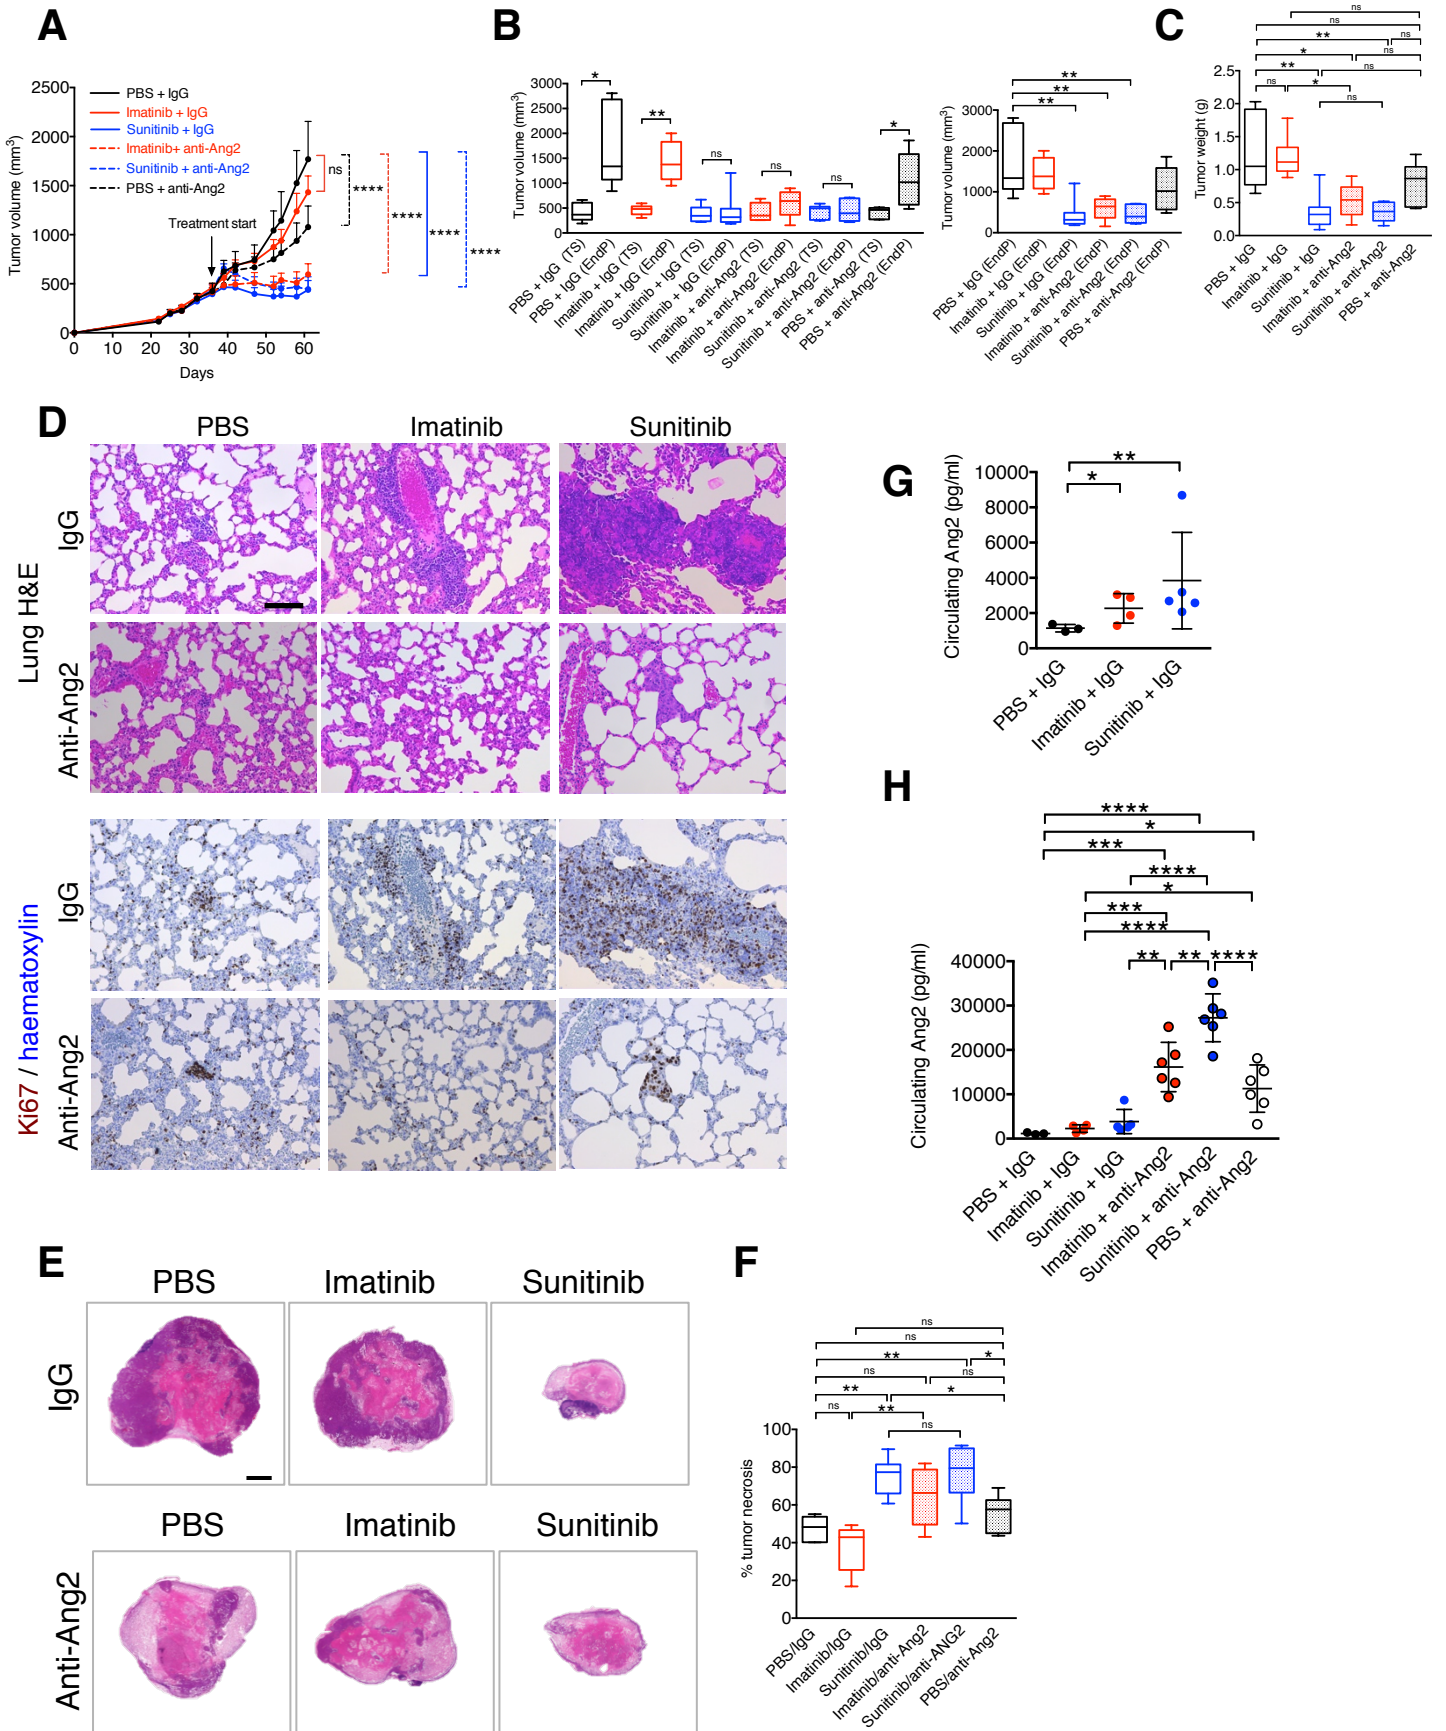

**Supplementary Figure 3. Combinatorial treatment of imatinib / sunitinib and Anti-Ang2 antibody synergistically suppresses tumor growth and lung metastasis**

**A.** Tumor volume measurements of orthotopically implanted MDA-MB-231 tumors over time in experimental groups (IgG: isotype control for anti-Ang2 Ab treatment, PBS: control for imatinib or sunitinib). Treatments started when average tumor burden reached 500 mm<sup>3</sup>. Statistical significance was determined by two-way ANOVA with Sidak's multiple comparison test. **B.** Tumor volumes at treatments start (TS) and experimental end point (EndP) within indicated experimental groups. Statistical significance was determined by unpaired two-tailed t-test. IgG + PBS, n=5; IgG + imatinib, n=6; anti-ANG2 + imatinib, n=6; IgG + sunitinib, n=7; anti-ANG2 + sunitinib, n=6; anti-ANG2 + PBS, n=6. **C.** Quantification of tumor weights at experimental endpoint in the indicated experimental groups. IgG + PBS, n=5; IgG + imatinib, n=6; anti-ANG2 + imatinib, n=6; anti-ANG2 + PBS, n=6; IgG + sunitinib, n=7; anti-ANG2 + sunitinib, n=6. **D.** H&E staining and Ki67 immunostaining on consecutive FFPE sections of lungs from the indicated experimental groups to show lung metastasis. Scale bar: 100  $\mu$ m. **E.** Representative images of total tumors from the indicated groups stained with H&E, depicting tumor necrosis. **F.** Quantification of the percentage of tumor necrotic area. IgG + PBS, n=5; IgG + imatinib, n=5; anti-ANG2 + imatinib, n=6; anti-ANG2 + PBS, n=6; IgG + sunitinib, n=7; anti-ANG2 + sunitinib, n=6. **G.** Quantification of plasma circulating Ang2 protein levels in the indicated experimental groups. IgG + PBS, n=3; IgG + imatinib, n=4; IgG + sunitinib, n=5. Unpaired two-tailed t-test was used to determine statistical significance. **H.** Quantification of circulating plasma Ang2 protein levels in the indicated experimental groups. IgG + PBS, n=3; IgG + imatinib, n=4; anti-

ANG2 + imatinib, n=6; anti-ANG2 + PBS, n=6; IgG + sunitinib, n=5; anti-ANG2 + sunitinib, n=6. Data is represented as the mean +/- S.D. Unless otherwise indicated, One-way ANOVA with Tukey's multiple comparison test was used to determine statistical significance. \*  $p < 0.05$ , \*\*  $p < 0.01$ , \*\*\*  $p < 0.001$ , \*\*\*\*  $p < 0.0001$ , ns: not significant.



# Supplementary Figure 4

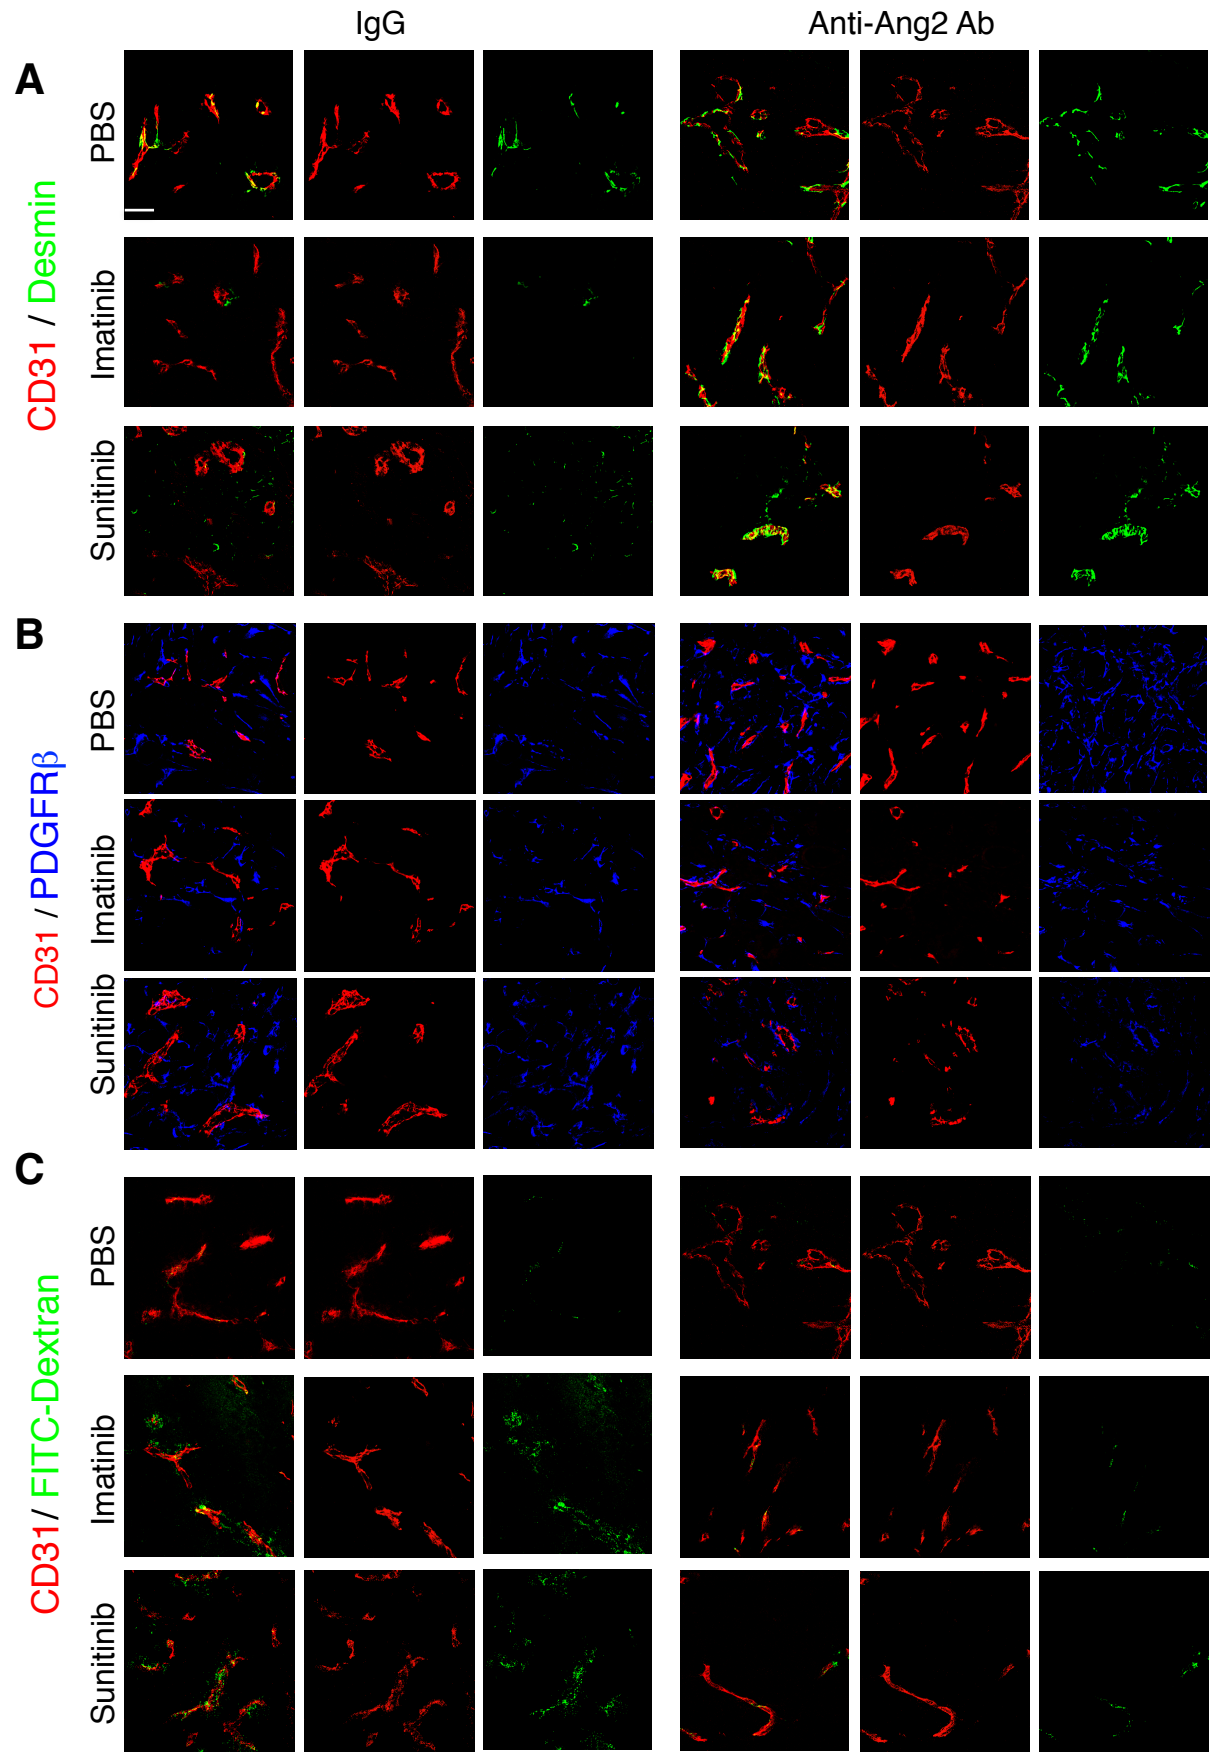

**Supplementary Figure 4. Representative images of individual channels for differential pericyte coverage and vascular leakage levels in MDA-MB-231 tumor xenografts**

**A-C.** Immunostaining of CD31/Desmin (A) and CD31/PDGFR $\beta$  (B) as well as visualization of perfused 2,000 kDa FITC-dextran (C) associated to CD31 immunostaining on MDA-MB-231 FFPE tumor sections in the indicated experimental groups. Separate channel images are provided. Scale bar: 50 $\mu$ m.

# Supplementary Figure 5

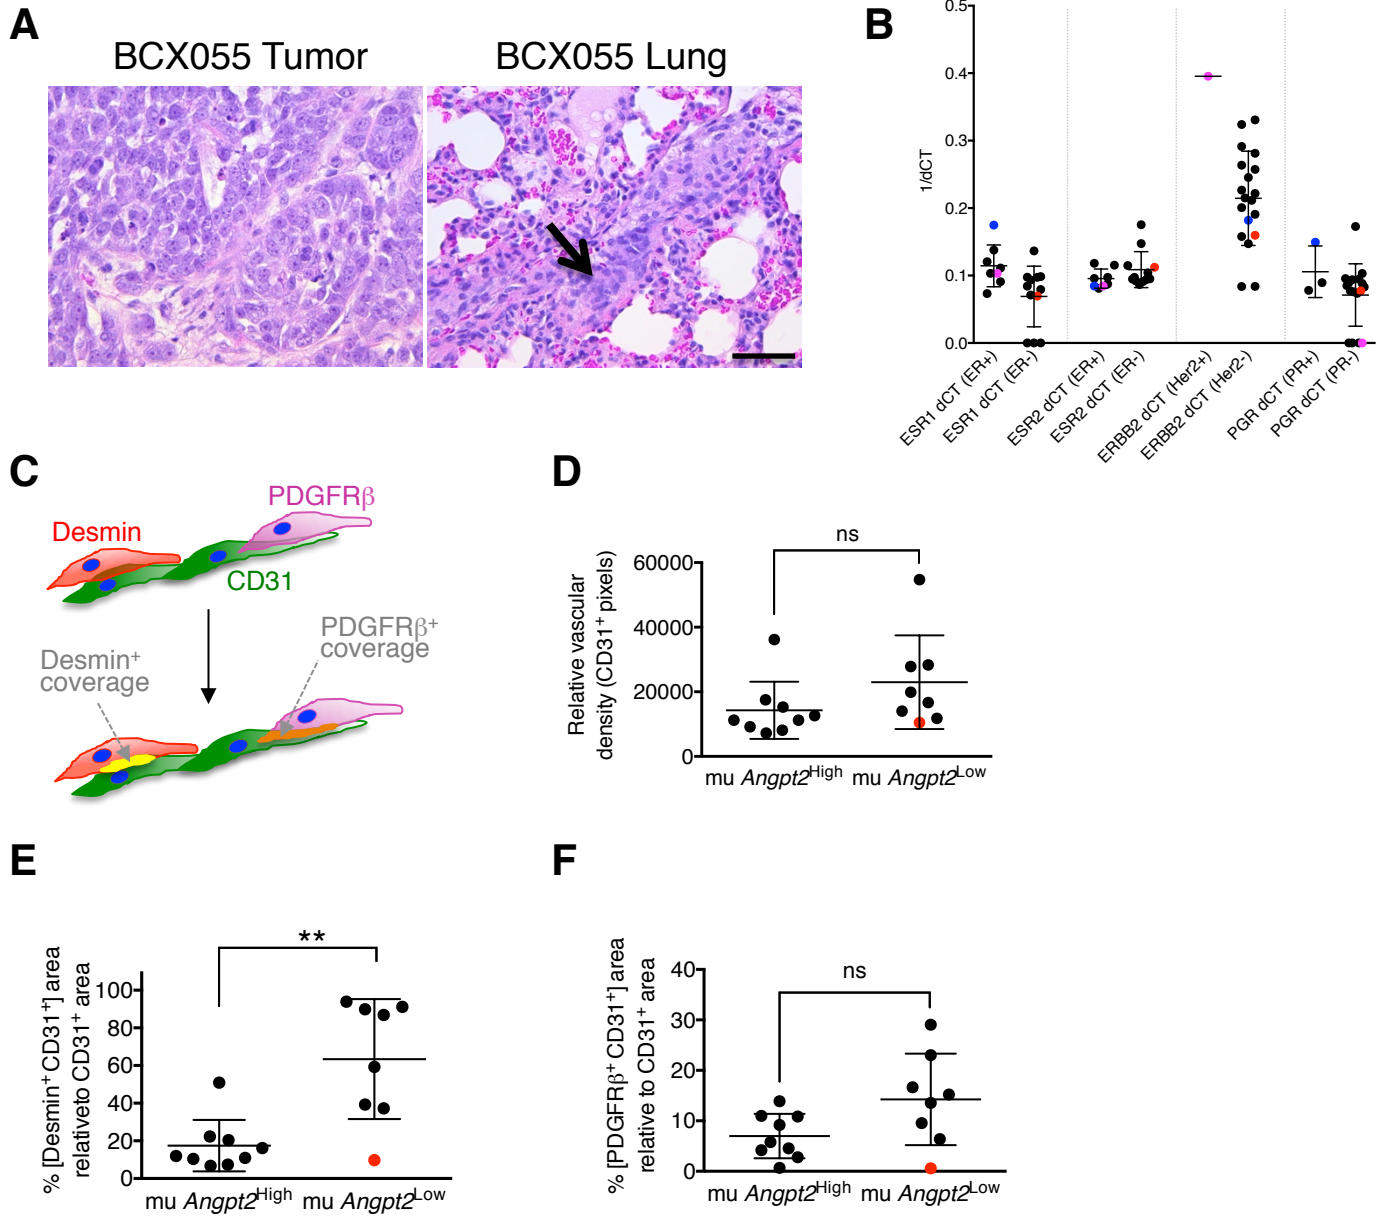

**Supplementary Figure 5. Characterization of patient-derived xenograft (PDX) models of breast cancer**

**A.** Representative images of H&E stained PDX tumor and lung sections. Note lung section showing micrometastasis. Scale bar: 50  $\mu$ m. **B.** Analysis of transcript levels of ESR1, ESR2, ERBB2 and PGR in each PDX model. Data is represented as 1/dCT. For each gene, values are split based on different primary tumor receptor status (ER<sup>+</sup> or ER<sup>-</sup>; Her2<sup>+</sup> or Her2<sup>-</sup>; PGR<sup>+</sup> or PGR<sup>-</sup>). Transcripts from MCF7 (Blue dot; ESR1<sup>+</sup>; ESR2<sup>-</sup>; ERBB2<sup>-</sup>; PGR<sup>+</sup>), SKBR3 (Pink dot; ESR1<sup>-</sup>; ESR2<sup>-</sup>; ERBB2<sup>+</sup>; PGR<sup>-</sup>) and MDA-MB-231 (Red dot; ESR1<sup>-</sup>; ESR2<sup>-</sup>; ERBB2<sup>-</sup>; PGR<sup>-</sup>) cells are used as controls to determine positivity for each gene. **C.** Illustration of pericyte covered tumor vessels depicting co-localization of CD31 (endothelial cells) and pericytes markers (Desmin and PDGFR $\beta$ ). **D.** Quantification of relative vascular density (CD31<sup>+</sup> area) in different BCX models according to *Angpt2* expression levels. **E.** Quantification of relative percentage of Desmin<sup>+</sup> pericytes associated with CD31<sup>+</sup> vessels in different BCX models according to *Angpt2* expression levels. **F.** Quantification of relative percentage of PDGFR $\beta$ <sup>+</sup> pericytes associated with CD31<sup>+</sup> vessels in different BCX models according to *Angpt2* expression levels. The red dot in **D-F** identifies BCX042. Experimental n numbers were as follows, Mu *Angpt2*<sup>High</sup>, n=9; Mu *Angpt2*<sup>Low</sup>, n=8. Data is represented as the mean +/- S.D. Unpaired two-tailed t-test was used to determine statistical significance. \*\* p < 0.01. ns : not significant, ns: not significant.

# Supplementary Figure 6

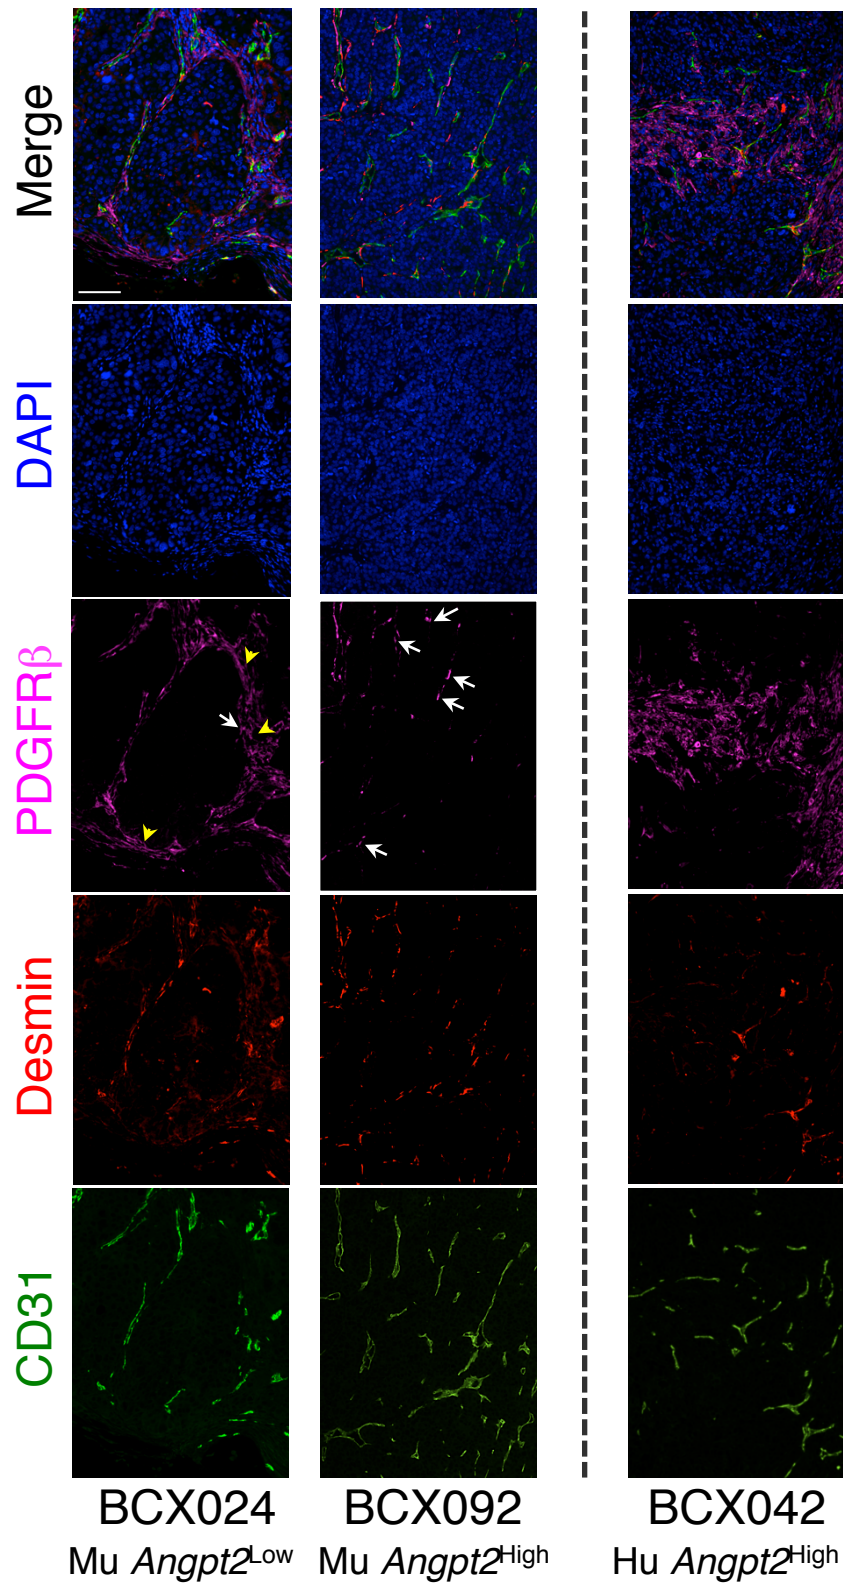

**Supplementary Figure 6. Representative images of differential pericyte and vascular coverage levels in different PDX breast cancer models**

Representative images of tumors immunolabeled for CD31, Desmin and PDGFR $\beta$  in indicated PDX models. Separate channel images are provided. White arrows indicate PDGFR $\beta$ <sup>+</sup>Desmin<sup>-</sup> pericytes. Yellow arrowheads indicate PDGFR $\beta$ <sup>+</sup> non-perivascular cells that were excluded from quantification. Note that BCX042 tumor expresses exceptionally high levels of cancer derived Hu *Angpt2*. Scale bar: 100  $\mu$ m.

**Table S1. Baseline demographics and clinical characteristics of cohort 1**

|                                 | TNBC<br>n=28     | Luminal<br>n=57  |
|---------------------------------|------------------|------------------|
| <b>Median age at diagnosis</b>  |                  |                  |
|                                 | 48 (range 32-73) | 54 (range 31-88) |
| <b>Tumor size</b>               |                  |                  |
| < 2.0                           | 12               | 28               |
| 2.0 to < 5.0                    | 10               | 24               |
| > or = 5.0                      | 4                | 4                |
| N/A                             | 2                | 1                |
| <b>Stage</b>                    |                  |                  |
| I                               | 0                | 21               |
| II                              | 0                | 11               |
| III                             | 0                | 2                |
| IA                              | 10               | 0                |
| IIA                             | 8                | 10               |
| IIB                             | 4                | 3                |
| IIIA                            | 1                | 1                |
| IIIB                            | 5                | 2                |
| N/A                             | 0                | 7                |
| <b>Lymph node</b>               |                  |                  |
| N0                              | 20               | 32               |
| N1                              | 6                | 18               |
| N2                              | 2                | 1                |
| N/A                             | 0                | 6                |
| <b>Tumor size</b>               |                  |                  |
| T1                              | 10               | 30               |
| T2                              | 11               | 19               |
| T3                              | 2                | 3                |
| T4                              | 5                | 2                |
| N/A                             | 0                | 3                |
| <b>Distant metastasis</b>       |                  |                  |
| M0                              | 28               | 49               |
| M1                              | 0                | 1                |
| N/A                             | 0                | 7                |
| <b>Histological grade</b>       |                  |                  |
| 1                               | 1                | 7                |
| 2                               | 5                | 32               |
| 3                               | 20               | 17               |
| N/A                             | 2                | 1                |
| <b>Relapse</b>                  |                  |                  |
| 0                               | 21               | 48               |
| 1                               | 7                | 9                |
| <b>Disease specific death</b>   |                  |                  |
| 0                               | 25               | 52               |
| 1                               | 2                | 5                |
| N/A                             | 1                | 0                |
| <b>Neoadjuvant chemotherapy</b> |                  |                  |
| 0                               | 23               | 46               |
| 1                               | 5                | 1                |
| N/A                             | 0                | 10               |
| <b>Adjuvant chemotherapy</b>    |                  |                  |
| 0                               | 7                | 21               |
| 1                               | 21               | 35               |
| N/A                             | 0                | 1                |
| <b>Radiation therapy</b>        |                  |                  |
| 0                               | 8                | 23               |
| 1                               | 20               | 33               |
| N/A                             | 0                | 1                |

**Table S1. Baseline demographics and clinical characteristics of cohort 1**

Patient demographic and clinical characteristics, TNBC: triple negative breast cancer. Histological grade: 1, low grade/well differentiated; 2, intermediate/moderately differentiated; 3, high grade/poorly differentiated. Relapse, Disease specific death, neoadjuvant chemotherapy, Adjuvant chemotherapy, Radiation therapy: 0, no; 1, yes; N/A: not applicable/unknown.



**Table S2. Baseline demographics and clinical characteristics of cohort 2**

|                                    | Epirubicin mono therapy<br>n=51 | Paclitaxel mono therapy<br>n=42 | Epirubicin 1 - Paclitaxel 2<br>n=23 | Paclitaxel 1- Epirubicin 2<br>n=28 | All patients<br>n=144 |
|------------------------------------|---------------------------------|---------------------------------|-------------------------------------|------------------------------------|-----------------------|
| Median age at diagnosis(range)     | 53 (range 31-68)                | 52 (range 28-70)                | 51(range 29-68)                     | n=47 (range 31-66)                 | 51 (range 28-70)      |
| <b>Response to first treatment</b> |                                 |                                 |                                     |                                    |                       |
| CR                                 | 3                               | 4                               | 0                                   | 0                                  | 7                     |
| PR                                 | 36                              | 31                              | 0                                   | 0                                  | 67                    |
| SD                                 | 12                              | 7                               | 15                                  | 20                                 | 54                    |
| PD                                 | 0                               | 0                               | 8                                   | 8                                  | 16                    |
| <b>Tumor size</b>                  |                                 |                                 |                                     |                                    |                       |
| T1                                 | 0                               | 0                               | 1                                   | 0                                  | 1                     |
| T2                                 | 1                               | 1                               | 0                                   | 0                                  | 2                     |
| T3                                 | 45                              | 30                              | 17                                  | 23                                 | 115                   |
| T4                                 | 5                               | 11                              | 5                                   | 5                                  | 26                    |
| <b>Lymph node involvement</b>      |                                 |                                 |                                     |                                    |                       |
| N0                                 | 20                              | 16                              | 8                                   | 9                                  | 53                    |
| N1                                 | 24                              | 19                              | 9                                   | 16                                 | 68                    |
| N2                                 | 6                               | 7                               | 5                                   | 3                                  | 21                    |
| N3                                 | 1                               | 0                               | 0                                   | 0                                  | 1                     |
| N/A                                | 0                               | 0                               | 1                                   | 0                                  | 1                     |
| <b>Distant metastasis</b>          |                                 |                                 |                                     |                                    |                       |
| M0                                 | 48                              | 36                              | 20                                  | 25                                 | 129                   |
| M1                                 | 3                               | 6                               | 3                                   | 3                                  | 15                    |
| <b>Estrogen receptor</b>           |                                 |                                 |                                     |                                    |                       |
| Positive                           | 24                              | 27                              | 11                                  | 17                                 | 79                    |
| Negative                           | 27                              | 15                              | 12                                  | 10                                 | 64                    |
| N/A                                | 0                               | 0                               | 0                                   | 1                                  | 1                     |
| <b>Progesterone receptor</b>       |                                 |                                 |                                     |                                    |                       |
| Positive                           | 24                              | 23                              | 10                                  | 10                                 | 67                    |
| Negative                           | 27                              | 18                              | 13                                  | 17                                 | 75                    |
| N/A                                | 0                               | 1                               | 0                                   | 1                                  | 2                     |
| <b>HER2</b>                        |                                 |                                 |                                     |                                    |                       |
| Positive                           | 13                              | 10                              | 7                                   | 9                                  | 39                    |
| Negative                           | 28                              | 25                              | 12                                  | 10                                 | 75                    |
| N/A                                | 10                              | 7                               | 4                                   | 9                                  | 30                    |
| <b>TNBC(ER/PGR/HER2 negative)</b>  |                                 |                                 |                                     |                                    |                       |
|                                    | 12                              | 7                               | 6                                   | 4                                  | 29                    |
| <b>TP53 mutations</b>              |                                 |                                 |                                     |                                    |                       |
| Mutant                             | 12                              | 9                               | 8                                   | 6                                  | 35                    |
| Wild-type                          | 39                              | 33                              | 15                                  | 22                                 | 109                   |

**Table S2. Baseline demographics and clinical characteristics of cohort 2**

Patient demographic and clinical characteristics. CR, complete response; PR, partial response; SD, stable disease; PD, progressive disease. N/A: not applicable/unknown.

**Table S3. Baseline demographics and clinical characteristics of sub-groups within cohort 2**

| Neoadjuvant therapy            | Epirubicin monotherapy |              | Paclitaxel monotherapy |              | Epirubicin 1 - Paclitaxel 2 |              | Paclitaxel 1 - Epirubicin 2 |              | All patients |              |
|--------------------------------|------------------------|--------------|------------------------|--------------|-----------------------------|--------------|-----------------------------|--------------|--------------|--------------|
|                                | Low<br>n=25            | High<br>n=26 | Low<br>n=21            | High<br>n=21 | Low<br>n=11                 | High<br>n=12 | Low<br>n=14                 | High<br>n=14 | Low<br>n=72  | High<br>n=72 |
| Desmin+/PDGFRβ+ ratio          |                        |              |                        |              |                             |              |                             |              |              |              |
| Median age at diagnosis(range) | 52(38-68)              | 55(31-68)    | 49(28-67)              | 53(38-70)    | 54(31-67)                   | 49(44-68)    | 48(33-66)                   | 46(31-57)    | 51(28-70)    | 52(31-70)    |
| Response to first treatment    |                        |              |                        |              |                             |              |                             |              |              |              |
| CR                             | 0                      | 3            | 1                      | 3            | 0                           | 0            | 0                           | 0            | 1            | 6            |
| PR                             | 17                     | 19           | 18                     | 13           | 0                           | 0            | 0                           | 0            | 37           | 30           |
| SD                             | 8                      | 4            | 2                      | 5            | 7                           | 8            | 10                          | 10           | 26           | 28           |
| PD                             | 0                      | 0            | 0                      | 0            | 4                           | 4            | 4                           | 4            | 8            | 8            |
| Tumor size                     |                        |              |                        |              |                             |              |                             |              |              |              |
| T1                             | 0                      | 0            | 0                      | 0            | 0                           | 1            | 0                           | 0            | 0            | 1            |
| T2                             | 0                      | 1            | 0                      | 1            | 0                           | 0            | 0                           | 0            | 0            | 2            |
| T3                             | 23                     | 22           | 16                     | 14           | 8                           | 9            | 11                          | 12           | 59           | 56           |
| T4                             | 2                      | 3            | 5                      | 6            | 3                           | 2            | 3                           | 2            | 13           | 13           |
| Lymph node involvement         |                        |              |                        |              |                             |              |                             |              |              |              |
| N0                             | 11                     | 9            | 8                      | 8            | 4                           | 4            | 3                           | 6            | 29           | 24           |
| N1                             | 12                     | 12           | 12                     | 7            | 6                           | 3            | 9                           | 7            | 36           | 32           |
| N2                             | 1                      | 5            | 1                      | 6            | 1                           | 4            | 2                           | 1            | 6            | 15           |
| N3                             | 1                      | 0            | 0                      | 0            | 0                           | 0            | 0                           | 0            | 1            | 0            |
| N/A                            | 0                      | 0            | 0                      | 0            | 0                           | 1            | 0                           | 0            | 0            | 1            |
| Distant metastasis             |                        |              |                        |              |                             |              |                             |              |              |              |
| M0                             | 23                     | 25           | 18                     | 18           | 9                           | 11           | 12                          | 13           | 63           | 66           |
| M1                             | 2                      | 1            | 3                      | 3            | 2                           | 1            | 2                           | 1            | 9            | 6            |
| Estrogen receptor              |                        |              |                        |              |                             |              |                             |              |              |              |
| Positive                       | 10                     | 14           | 14                     | 13           | 6                           | 5            | 7                           | 10           | 39           | 40           |
| Negative                       | 15                     | 12           | 7                      | 8            | 5                           | 7            | 6                           | 4            | 32           | 32           |
| N/A                            | 0                      | 0            | 0                      | 0            | 0                           | 0            | 1                           | 0            | 1            | 0            |
| Progesterone receptor          |                        |              |                        |              |                             |              |                             |              |              |              |
| Positive                       | 10                     | 14           | 12                     | 11           | 5                           | 5            | 4                           | 6            | 31           | 36           |
| Negative                       | 15                     | 12           | 8                      | 10           | 6                           | 7            | 9                           | 8            | 39           | 36           |
| N/A                            | 0                      | 0            | 1                      | 0            | 0                           | 0            | 1                           | 0            | 2            | 0            |
| HER2                           |                        |              |                        |              |                             |              |                             |              |              |              |
| Positive                       | 6                      | 7            | 5                      | 5            | 3                           | 4            | 6                           | 3            | 21           | 18           |
| Negative                       | 13                     | 15           | 13                     | 12           | 7                           | 5            | 5                           | 5            | 36           | 39           |
| N/A                            | 6                      | 4            | 3                      | 4            | 1                           | 3            | 3                           | 6            | 15           | 15           |
| TNBC(ER/PGR/HER2 negative)     |                        |              |                        |              |                             |              |                             |              |              |              |
|                                | 6                      | 6            | 2                      | 5            | 2                           | 4            | 2                           | 2            | 11           | 18           |
| TP53 mutations                 |                        |              |                        |              |                             |              |                             |              |              |              |
| Mutant                         | 5                      | 7            | 2                      | 7            | 5                           | 3            | 3                           | 3            | 16           | 19           |
| Wild-type                      | 20                     | 19           | 19                     | 14           | 6                           | 9            | 11                          | 11           | 56           | 53           |

**Table S3. Baseline demographics and clinical characteristics of sub-groups within cohort 2**

Patient demographic and clinical characteristics. CR, complete response; PR, partial response; SD, stable disease; PD, progressive disease. N/A: not applicable/unknown.

Patients were segregated into the following sub-groups: epirubicin monotherapy (n=51), paclitaxel monotherapy (n=42), epirubicin 1 - paclitaxel 2 (epirubicin, followed by paclitaxel; n=23), paclitaxel 1- epirubicin 2 (paclitaxel, followed by epirubicin; n=28).

**Table S4. Clinical characteristics of patients (left) and histopathological analysis of patient derived xenografts (right).**

| Patient    | BCX # | Race     | Histology                  | Stage at Dx | ER | PR | HER2 | HER2 FISH | Ki67 | BCX #      | Passage # | Tumor Weight (g) | Lung metastasis (Y/N/S) | Hypoxyprobe | Desmin+ coverage | PDGFRβ+ coverage | Vascular Density | mo Angpt2 (dCt) | Hu Angpt2 (dCt) |
|------------|-------|----------|----------------------------|-------------|----|----|------|-----------|------|------------|-----------|------------------|-------------------------|-------------|------------------|------------------|------------------|-----------------|-----------------|
| Patient 1  | 6     | Black    | Ductal                     | IIIB        | 0  | 0  | 0    | NA        | NA   | BCX006 (1) | P36       | NR               | N                       |             |                  |                  |                  |                 |                 |
|            |       |          |                            |             |    |    |      |           |      | BCX006 (2) | P36       | 1.50             | N                       |             |                  |                  |                  |                 |                 |
|            |       |          |                            |             |    |    |      |           |      | BCX006 (3) | P36       | 1.10             | N                       | 35.52726477 | 11.97%           | 4.54%            | 7875.59375       | 0.2663460       | 10.1075096      |
| Patient 2  | 10    | White    | Metaplastic Spindle        | IV          | 0  | 0  | 0    | 1.1       | 80   | BCX010 (2) | P55       | 1.90             | N                       | 18.54694249 | 7.39%            | 5.82%            | 11204.06         | 0.9074020       | 11.4350452      |
|            |       |          |                            |             |    |    |      |           |      | BCX010 (3) | P55       | 1.20             | N                       | 16.81299819 | 41.26%           | 2.53%            |                  | -0.1210938      | 11.7031002      |
|            |       |          |                            |             |    |    |      |           |      |            |           |                  |                         |             |                  |                  |                  |                 |                 |
| Patient 3  | 11    | Black    | Metaplastic                | IIIA        | 0  | 0  | 0    | NA        | 35   | BCX011     | P40       | 0.80             | N                       | 26.86286634 | 46.62%           | 6.77%            | 7724.978723      | -0.8455544      | 13.7869034      |
|            |       |          |                            |             |    |    |      |           |      | BCX011     | P40       | 0.80             | N                       | 28.39817693 | 65.97%           | 20.99%           | 5408             | -0.0963135      | 14.2656021      |
| Patient 4  | 17    | White    | Ductal                     | IIB         | 25 | 0  | 1    | 4.12      | 50   | BCX017     | P20       | 0.59             | Y                       | 2.381922017 | 29.30%           | 6.79%            | 13246            | 0.2345772       | 11.4958553      |
|            |       |          |                            |             |    |    |      |           |      | BCX017     | P20       | 1.10             | N                       | 7.267274984 | 91.16%           | 39.21%           | 28348.61         | 0.8058739       | 10.9765911      |
| Patient 5  | 22    | Black    | Cystic papillary Carcinoma | IIA         | 2  | 0  | 0    | NA        | 75   | BCX022     | P20       | 1.70             | Y                       |             | 54.88%           | 8.94%            | 10555.18605      | -0.0952530      | 11.2142353      |
|            |       |          |                            |             |    |    |      |           |      | BCX022     | P21       | 0.30             | Y                       | 23.61642402 | 16.22%           | 9.47%            | 4985.304348      | -0.4286366      | 11.0269032      |
| Patient 6  | 24    | Asian    | Ductal                     | IA          | 10 | 0  | 0    | 1.07      | NA   | BCX024 (1) | P17       | 0.90             | N                       | 6.456143959 | 95.13%           | 36.11%           | 32797.66667      | 0.3666611       | UD              |
|            |       |          |                            |             |    |    |      |           |      | BCX024 (2) | P17       | 0.90             | N                       | 7.213879033 | 92.83%           | 22.01%           | 23650.94444      | 0.5243073       | 11.5877323      |
| Patient 7  | 42    | White    | Ductal                     | IIA         | 10 | 3  | 0    | NA        | 50   | BCX042     | P9        | NR               | N                       | 5.909260243 | 9.77%            | 0.58%            | 10482.625        | 1.4875526       | 1.1710567       |
| Patient 8  | 51    | Black    | Ductal                     | IIA         | 0  | 0  | 0    | NA        | 80   | BCX051     | P14       | 1.40             | S                       | 3.493418752 | 20.41%           | 10.97%           | 15273.5          | -2.4764862      | 7.8169918       |
| Patient 9  | 55    | white    | Ductal                     | IIA         | 0  | 0  | 0    | NA        | 80   | BCX055     | P12       | 0.90             | Y                       | 3.943870996 | 3.50%            | 0.31%            | 3237.061224      | -0.6098668      | UD              |
|            |       |          |                            |             |    |    |      |           |      | BCX055     | P12       | 0.60             | Y                       | 2.868395478 | 17.29%           | 1.07%            | 14601.55556      | -0.3597717      | UD              |
| Patient 10 | 70    | Black    | Ductal                     | IIA         | 0  | 0  | 0    | NA        | 90   | BCX070     | P11       | NR               | N                       | 33.3934411  | 53.63%           | 12.16%           | 232849           |                 |                 |
|            |       |          |                            |             |    |    |      |           |      | BCX070     | P11       | 1.00             | N                       | 35.8844175  | 48.44%           | 14.44%           | 9105.377778      | 0.4515724       | 12.2367744      |
|            |       |          |                            |             |    |    |      |           |      | BCX070     | P11       | 1.00             | N                       | 33.92165799 | 21.97%           | 12.27%           | 12123.94444      | 0.7607002       | 12.3241940      |
|            |       |          |                            |             |    |    |      |           |      | BCX070     | P12       | 1.80             | N                       | 7.582641619 | 24.90%           | 21.98%           | 8562.266667      | 0.3712311       | 11.8959141      |
| Patient 11 | 80    | Black    | Ductal                     | IIB         | 0  | 0  | 1    | NA        | 70   | BCX080     | P7        | 2.50             | N                       | 0.017294979 | 59.28%           | 13.56%           | 31897.36842      | 1.2849083       | 10.6739445      |
| Patient 12 | 84    | White    | Ductal                     | IIA         | 10 | 0  | 1    | NA        | 80   | BCX084     | P8        | NR               | N                       | 20.25933386 | 11.23%           | 6.14%            | 4650.962243      |                 |                 |
|            |       |          |                            |             |    |    |      |           |      | BCX084 (1) | P8        | 2.50             | N                       | 11.73451036 | 10.58%           | 5.60%            | 5249.608696      | -0.9630890      | UD              |
| Patient 13 | 92    | White    | Ductal                     | IA          | 2  | 0  | 1    | NA        | 50   | BCX092     | P3        | 1.50             | N                       | 14.88966123 |                  |                  |                  |                 |                 |
|            |       |          |                            |             |    |    |      |           |      | BCX092     | P3        | 2.50             | N                       | 8.452650088 | 6.77%            | 2.79%            | 36167.55556      | 0.3638458       | 13.3749065      |
| Patient 14 | 94    | Black    | Ductal                     | IIA         | 0  | 0  | 0    | NA        | 70   | BCX094     | P7        | NR               | N                       | 1.086136169 | 39.30%           | 16.64%           | 19888.68182      | 0.8276196       | UD              |
| Patient 15 | 100   | Hispanic | Ductal (spindloid)         | IIIB        | 20 | 1  | 0    | NA        | 70   | BCX100     | P4        | NR               | N                       | 7.187716284 |                  |                  |                  | 0.4773979       | 9.5969734       |
|            |       |          |                            |             |    |    |      |           |      | BCX100 (1) | P4        | 1.00             | N                       | 12.40126213 | 43.74%           | 5.48%            | 25745.13514      | 0.1979465       | 7.6808128       |
|            |       |          |                            |             |    |    |      |           |      | BCX100 (2) | P4        | 0.40             | N                       | 5.917346433 | 89.92%           | 7.26%            | 14014.25         | 1.0477448       | 7.3940868       |
| Patient 16 | 102   | Black    | Ductal                     | IIA         | 0  | 0  | 2+   | 1.09      |      | BCX102     | P3        | 0.80             | N                       | 7.885162865 | 86.83%           | 10.96%           | 11763            | 1.4707050       | UD              |
|            |       |          |                            |             |    |    |      |           |      | BCX102     | P3        | NR               | S                       | 8.669022915 | 63.82%           | 8.16%            | 6525.266667      | 1.0398598       | 12.6946354      |
| Patient 17 | 105   | White    | Ductal                     | IIA         | 40 | 40 | 0    | NA        | 80   | BCX105     | P2        | 0.80             | N                       | 23.7782772  | 38.08%           | 10.85%           | 29399.14642      | -1.2432938      | 10.6454391      |

Y Yes  
 N No  
 NA Not applicable

mo Angpt2 > median dCt  
 mo Angpt2 < or = median dCt  
 Y Yes  
 N No  
 S Suspected  
 NR Not recorded

**Table S4. Clinical characteristics of patients (left) and histopathological analysis of patient derived xenografts (right).**

33 BCX from 17 patients were analyzed for murine (Mu) and human (Hu) *Angpt2* transcripts. The pink shaded cells indicates BCX with high mouse *Angpt2* transcript (Mu *Angpt2*<sup>High</sup>) and the unshaded cells indicates BCX with low mouse *Angpt2* transcript (Mu *Angpt2*<sup>Low</sup>) using the median dCt as a cutoff. The Ki67 column is expressed as percent positive tumor cells among the total number of tumor cells assessed. In the BCX # column, the numbers within parentheses reflect BCX from the same patients but harvested from distinct mice. Dx, diagnosis; NA, not applicable; UD, undetectable; Y, yes; N, no; S, suspected; NR, not recorded; empty cells, the analyses were not performed.
